# Supplementary material for: Characterization of organic species and functional groups in pollen, fungi, algae, and bacteria bioaerosols
Source: Royal Society of Chemistry journal article supplement (doi:10.1039/d4ea00083h), 2024-01-01
Supplement: d4ea00083h1.pdf [file d4ea00083h1.pdf]

1 **Characterization of organic species and functional groups in pollen, fungi, algae, and**  
2 **bacteria bioaerosols**

3

4 Palina Bahdanovich<sup>1,2</sup>, Kevin Axelrod<sup>1,2</sup>, Andrey Y. Khlystov<sup>1,2</sup>, Vera Samburova<sup>1,2,\*</sup>

5

6 <sup>1</sup>Desert Research Institute, 2215 Raggio Parkway, Reno, NV 89512, USA

7 <sup>2</sup>University of Nevada, Reno, 1664 N Virginia St, Reno, NV 89557, USA

8 \*Correspondence: vera.samburova@dri.edu

9

10 **Table S1.** Standard compounds used for <sup>1</sup>H-NMR bioaerosol functional group and chemical shift assignment.

| <sup>1</sup> H-NMR Standards                                                      | Compounds                                                                                                 |
|-----------------------------------------------------------------------------------|-----------------------------------------------------------------------------------------------------------|
| 1. <u>Saccharides</u><br>(DMSO- <i>d</i> <sub>6</sub> and D <sub>2</sub> O)       | D-(+)-Glucose, Fructose, Galactose, Mannose, Sucrose, Starch (potato origin)                              |
| 2. <u>Sugar Alcohols</u><br>(DMSO- <i>d</i> <sub>6</sub> and D <sub>2</sub> O)    | Glycerol, Erythritol, Inositol, Mannitol, Arabitol                                                        |
| 3. <u>Fatty Acids</u><br>(DMSO- <i>d</i> <sub>6</sub> and D <sub>2</sub> O)       | Palmitic, Stearic, Glutaric, Tridecanoic, Adipic acids                                                    |
| 4. <u>Triacylglycerides</u><br>(DMSO- <i>d</i> <sub>6</sub> and D <sub>2</sub> O) | Tri-arachidin, Tri-oleate, Glyceryl tri-heptadecanoate, 1-stearoyl-rac-glycerol, Glyceryl tri-palmitate   |
| 5. <u>Amino Acids</u><br>(DMSO- <i>d</i> <sub>6</sub> and D <sub>2</sub> O)       | Proline, Leucine, Glutamic Acid, Arginine, Phenylalanine                                                  |
| 6. <u>Carboxylic Acids</u><br>(DMSO- <i>d</i> <sub>6</sub> only)                  | Succinic, Malonic acids                                                                                   |
| 7. <u>PAHs</u><br>(DMSO- <i>d</i> <sub>6</sub> only)                              | Phenanthrene, Retene                                                                                      |
| 8. <u>Oxygenated PAHs</u><br>(DMSO- <i>d</i> <sub>6</sub> only)                   | Anthraquinone, Perinaphthenone                                                                            |
| 9. <u>Aldehydes</u><br>(DMSO- <i>d</i> <sub>6</sub> only)                         | Acetaldehyde                                                                                              |
| 10. <u>Aliphatic Alcohols</u>                                                     | Isopropyl (DMSO- <i>d</i> <sub>6</sub> only), Methanol (DMSO- <i>d</i> <sub>6</sub> and D <sub>2</sub> O) |
| 11. <u>Aromatic Alcohols</u><br>(DMSO- <i>d</i> <sub>6</sub> only)                | Phenol                                                                                                    |

12 **Table S2.** Calibration standards for bioaerosol GC-MS saccharide analysis and UPLC-MS amino acid analysis.  
 13 Internal standard (IS) used for saccharide analysis is glucose-d7 and nonadecanoic acid (C19:0) for fatty acid  
 14 analysis.

| <b>Saccharide Standards<br/>(GC-MS)</b> | <b>Amino Acid Standards<br/>(UPLC-MS)</b> | <b>Fatty Acid Standards<br/>(UPLC-MS)</b> |
|-----------------------------------------|-------------------------------------------|-------------------------------------------|
| Sucrose                                 | Phenylalanine                             | Dodecanoic (C12:0)                        |
| Trehalose                               | Tryptophan                                | Myristic (C14:0)                          |
| $\alpha$ -D-arabinose                   | Leucine                                   | Palmitic (C16:0)                          |
| $\beta$ -D-arabinose                    | Isoleucine                                | Stearic (C18:0)                           |
| $\alpha$ -D-fructose                    | GABA                                      | Oleic (C18:1)                             |
| $\beta$ -D-fructose                     | Methionine                                | Linoleic (C18:2)                          |
| D-(+)-galactose                         | Valine                                    | Linolenic (C18:3)                         |
| D-(+)-glucose                           | Proline                                   | Nonadecanoic (C19:0) (IS)                 |
| $\alpha$ -lactose                       | Tyrosine                                  | Eicosanoic (C20:0)                        |
| $\alpha$ -L-mannose                     | Alanine                                   |                                           |
| $\beta$ -L-mannose                      | $\beta$ -alanine                          |                                           |
| $\alpha$ -D-xylose                      | Hydroxyproline                            |                                           |
| $\beta$ -D-xylose                       | Threonine                                 |                                           |
| glucose-d7 (IS)                         | Glycine                                   |                                           |
|                                         | Serine                                    |                                           |
|                                         | Citrulline                                |                                           |
|                                         | Glutamic Acid                             |                                           |
|                                         | Histidine                                 |                                           |
|                                         | Arginine                                  |                                           |
|                                         | Lysine                                    |                                           |

15

16 **Table S3.** Chemical shifts of various solvents, determined from solvent spectra and adopted from the “NMR Solvent  
17 Data Chart” by Cambridge Isotope Laboratories, Inc. (Cambridge Isotope Laboratories Inc., n.d.). To be consistent  
18 with solvent and water peaks present in each spectrum (standard and bioaerosol spectra), these were cut from the  
19 calculations as follows: TMS peak was cut from -0.02 to 0.02 ppm, DMSO-d<sub>6</sub> peak was cut from 2.45 to 2.55 ppm,  
20 H<sub>2</sub>O peak (absorption of water due to DMSO-d<sub>6</sub> solvent use) was cut from 3.23 to 3.43 ppm, and the acetone peak  
21 (located at 2.07 ppm and used while preparing samples) was cut from 2.06 to 2.08 ppm.  
22

| <b>Solvent</b>      | <b>Solvent chemical shift (ppm)</b> |
|---------------------|-------------------------------------|
| TMS                 | 0.00                                |
| DMSO-d <sub>6</sub> | 2.50                                |
| H <sub>2</sub> O    | 3.33                                |
| Acetone             | 2.05 (2.07 in our spectra)          |
| D <sub>2</sub> O    | 4.79                                |

24 **Table S4.** Concentrations and standard deviations (in  $\mu\text{g}/\text{mg}$ ) of individual organic compounds found in bioaerosols. “-” stands for bioaerosols that were not  
 25 tested for specific compounds. All values presented are above the method detection limit (MDL), which varies for each compound.  
 26

|                    | <b>Bioaerosols</b>                                                        |                  |                   |                          |                  |                            |                            |                            |                    |
|--------------------|---------------------------------------------------------------------------|------------------|-------------------|--------------------------|------------------|----------------------------|----------------------------|----------------------------|--------------------|
|                    | <b>Compounds</b>                                                          | <b>Bacillus</b>  | <b>Pedobacter</b> | <b>Western Gall Rust</b> | <b>Spirulina</b> | <b>Lodgepole Pine 2020</b> | <b>Lodgepole Pine 2021</b> | <b>Lodgepole Pine 2022</b> | <b>Rabbitbrush</b> |
|                    | <b>Starch</b>                                                             | 0.45 $\pm$ 0.05  | -                 | 4.30 $\pm$ 0.06          | 0.64 $\pm$ 0.05  | 0.94 $\pm$ 0.06            | -                          | -                          | -                  |
|                    | <b><math>\alpha</math>-D-arabinose</b>                                    | 0                | -                 | 0.24 $\pm$ 0.04          | 0                | 0                          | 0                          | 0                          | 0.61 $\pm$ 0.01    |
|                    | <b><math>\beta</math>-D-arabinose</b>                                     | 0                | -                 | 0.17 $\pm$ 0.04          | 0                | 0.04 $\pm$ 0.11            | 0.19 $\pm$ 0.04            | 0.08 $\pm$ 0.02            | 0.42 $\pm$ 0.02    |
|                    | <b><math>\alpha</math>-D-xylose</b>                                       | 0                | -                 | 0                        | 0                | 0                          | 0                          | 0                          | 0                  |
|                    | <b><math>\beta</math>-D-xylose</b>                                        | 0                | -                 | 0.29 $\pm$ 0.05          | 0                | 0                          | 0                          | 0                          | 0                  |
| <b>Saccharides</b> | <b><math>\alpha</math>-L-mannose &amp; <math>\alpha</math>-D-fructose</b> | 0                | -                 | 1.69 $\pm$ 0.28          | 0                | 0                          | 0                          | 0                          | 0                  |
|                    | <b><math>\beta</math>-D-fructose</b>                                      | 0                | -                 | 5.20 $\pm$ 1.03          | 2.43 $\pm$ 0.48  | 4.84 $\pm$ 2.34            | 11.43 $\pm$ 2.27           | 7.40 $\pm$ 1.47            | 42.25 $\pm$ 0.27   |
|                    | <b>D-(+)-galactose</b>                                                    | 0                | -                 | 1.05 $\pm$ 0.15          | 0                | 1.31 $\pm$ 1.42            | 5.32 $\pm$ 0.77            | 3.41 $\pm$ 0.49            | 0.51 $\pm$ 0.004   |
|                    | <b>D-(+)-glucose</b>                                                      | 0.12 $\pm$ 0.02  | -                 | 3.07 $\pm$ 0.55          | 1.62 $\pm$ 0.29  | 12.17 $\pm$ 5.65           | 15.79 $\pm$ 2.84           | 12.29 $\pm$ 2.21           | 43.44 $\pm$ 1.22   |
|                    | <b><math>\beta</math>-L-mannose</b>                                       | 0                | -                 | 1.93 $\pm$ 0.31          | 0                | 0.33 $\pm$ 0.62            | 0.31 $\pm$ 0.05            | 0.36 $\pm$ 0.06            | 0                  |
|                    | <b>Sucrose</b>                                                            | 1.45 $\pm$ 0.11  | -                 | 1.41 $\pm$ 0.11          | 0.17 $\pm$ 0.01  | 75.75 $\pm$ 12.92          | 129.19 $\pm$ 10.05         | 160 $\pm$ 12.44            | 0                  |
|                    | <b><math>\alpha</math>-lactose</b>                                        | 0                | -                 | 0                        | 0                | 0                          | 0                          | 0                          | 0                  |
|                    | <b>Trehalose</b>                                                          | 0                | -                 | 0                        | 0                | 0                          | 0                          | 0                          | 0                  |
|                    | <b>Phenylalanine</b>                                                      | 0.20 $\pm$ 0.01  | 0.49 $\pm$ 0.03   | 0.04 $\pm$ 0.004         | 0.09 $\pm$ 0.004 | 0.22 $\pm$ 0.06            | -                          | -                          | 0.15 $\pm$ 0.008   |
|                    | <b>Tryptophan</b>                                                         | 0.06 $\pm$ 0.007 | 0.08 $\pm$ 0.004  | 0.49 $\pm$ 0.05          | 0                | 0.07 $\pm$ 0.01            | -                          | -                          | 0.07 $\pm$ 0.003   |
|                    | <b>Leucine</b>                                                            | 0.12 $\pm$ 0.006 | 0.60 $\pm$ 0.03   | 0.10 $\pm$ 0.001         | 0.16 $\pm$ 0.02  | 0.32 $\pm$ 0.09            | -                          | -                          | 0.21 $\pm$ 0.02    |
|                    | <b>Isoleucine</b>                                                         | 0.04 $\pm$ 0.001 | 0.42 $\pm$ 0.03   | 0.04 $\pm$ 0.004         | 0.07 $\pm$ 0.001 | 0.17 $\pm$ 0.06            | -                          | -                          | 0.07 $\pm$ 0.02    |
|                    | <b>GABA</b>                                                               | 3.71 $\pm$ 0.74  | 0.73 $\pm$ 0.02   | 1.18 $\pm$ 0.11          | 2.90 $\pm$ 0.06  | 1.07 $\pm$ 0.36            | -                          | -                          | 0                  |
| <b>Amino Acids</b> | <b>Methionine</b>                                                         | 0.16 $\pm$ 0.009 | 0.24 $\pm$ 0.004  | 0                        | 0                | 0                          | -                          | -                          | 0                  |

|                    |                              |               |              |              |              |             |              |   |               |
|--------------------|------------------------------|---------------|--------------|--------------|--------------|-------------|--------------|---|---------------|
|                    | <b>Valine</b>                | 0             | 0.63 ± 0.02  | 0.10 ± 0.008 | 0            | 0.34 ± 0.12 | -            | - | 0             |
|                    | <b>Proline</b>               | 0.23 ± 0.005  | 0.29 ± 0.004 | 0.06 ± 0.004 | 0.05 ± 0.001 | 3.65 ± 1.77 | -            | - | 15.05 ± 0.44  |
|                    | <b>Tyrosine</b>              | 0             | 0.42 ± 0.03  | 0            | 0.17 ± 0.04  | 0.24 ± 0.07 | -            | - | 0             |
|                    | <b>Alanine</b>               | 0.97 ± 0.07   | 1.02 ± 0.04  | 0.28 ± 0.03  | 0.32 ± 0.009 | 0.38 ± 0.13 | -            | - | 0.28 ± 0.01   |
|                    | <b>β-alanine</b>             | 0.10 ± 0.0007 | 0            | 0            | 0            | 0           | -            | - | 0             |
|                    | <b>Hydroxyproline</b>        | 0             | 0.09 ± 0.01  | 0            | 0            | 0           | -            | - | 0.78 ± 0.006  |
|                    | <b>Threonine</b>             | 0.45 ± 0.02   | 0.62 ± 0.01  | 0.15 ± 0.008 | 0            | 0           | -            | - | 0             |
|                    | <b>Glycine</b>               | 0             | 0            | 0            | 0            | 0           | -            | - | 0             |
|                    | <b>Serine</b>                | 0             | 0            | 0            | 0            | 0           | -            | - | 0             |
|                    | <b>Citrulline</b>            | 0.15 ± 0.01   | 0            | 0            | 0            | 0           | -            | - | 0             |
|                    | <b>Glutamic acid</b>         | 13.80 ± 0.15  | 1.09 ± 0.05  | 0.12 ± 0.04  | 3.60 ± 0.04  | 0.45 ± 0.22 | -            | - | 0             |
|                    | <b>Histidine</b>             | 0.16 ± 0.01   | 0            | 0            | 0            | 0           | -            | - | 1.49 ± 0.13   |
|                    | <b>Arginine</b>              | 0             | 0            | 0            | 0            | 2.55 ± 1.20 | -            | - | 0             |
|                    | <b>Lysine</b>                | 1.24 ± 0.05   | 0.70 ± 0.03  | 0            | 0            | 0           | -            | - | 0             |
|                    |                              |               |              |              |              |             |              |   |               |
|                    | <b>Dodecanoic acid C12:0</b> | 0             | -            | 0            | 0            | -           | 0            | - | 0.004 ± 0.006 |
|                    | <b>Myristic acid C14:0</b>   | 0.05 ± 0.006  | -            | 0.18 ± 0.02  | 0            | -           | 0.07 ± 0.009 | - | 0.03 ± 0.004  |
| <b>Fatty Acids</b> | <b>Linolenic acid C18:3</b>  | 0             | -            | 2.83 ± 0.58  | 0.85 ± 0.34  | -           | 1.19 ± 0.24  | - | 1.84 ± 0.38   |
|                    | <b>Linoleic acid C18:2</b>   | 0             | -            | 1.67 ± 0.18  | 0.69 ± 0.32  | -           | 7.35 ± 0.78  | - | 2.57 ± 0.27   |
|                    | <b>Palmitic acid C16:0</b>   | 0             | -            | 3.61 ± 0.53  | 1.30 ± 0.63  | -           | 6.94 ± 1.03  | - | 2.69 ± 0.40   |
|                    | <b>Oleic acid C18:1</b>      | 0             | -            | 1.20 ± 0.17  | 0.09 ± 0.07  | -           | 6.70 ± 0.95  | - | 0.17 ± 0.02   |
|                    | <b>Stearic acid C18:0</b>    | 0             | -            | 1.01 ± 0.20  | 0.13 ± 0.18  | -           | 2.98 ± 0.58  | - | 0.38 ± 0.07   |
|                    | <b>Eicosanoic acid C20:0</b> | 0             | -            | 0.12 ± 0.02  | 0            | -           | 0.60 ± 0.11  | - | 0.04 ± 0.008  |

**Table S5.** Correlation coefficients of aliphatic, saccharide, and amide  $^1\text{H-NMR}$  segments and concentrations of individual organic species (saccharides, amino acids, and fatty acids).

|             | Aliphatic<br>(Segment 1) | Saccharides<br>(Segment 3) | Amides<br>(Segment 7) |
|-------------|--------------------------|----------------------------|-----------------------|
| Saccharides | -0.610                   | 0.608                      | 0.441                 |
| Amino Acids | -0.130                   | 0.129                      | -0.002                |
| Fatty Acids | -0.442                   | 0.448                      | 0.090                 |

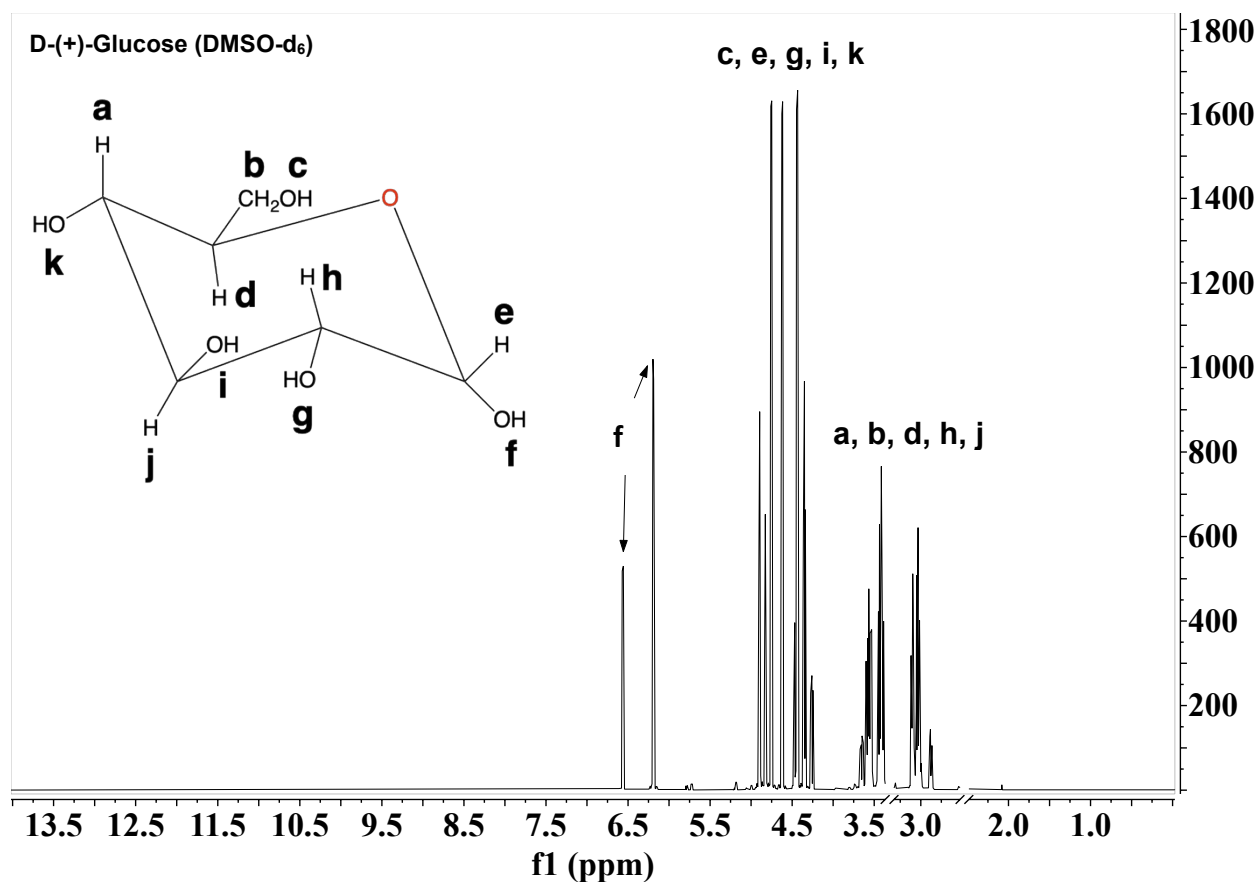

**Figure S1.**  $^1\text{H-NMR}$  spectrum (0 – 14 ppm) of D-(+)-Glucose used for assignment of polar (H) and non-polar (OH) regions within the spectrum for bioaerosol analysis.
